# Supplementary material for: Balancing selection on the complement system of a wild rodent
Source: Springer Nature journal article supplement (doi:10.1186/s12862-023-02122-0), 2023-05-25

# Balancing selection on the complement system of a wild rodent

Mridula Nandakumar, Max Lundberg, Fredric Carlsson, Lars Råberg

Supplementary Figure S1: Sliding window analysis of  $\beta_{std}$ ,  $\pi$ , and Tajima's D, haplotype network, and LD plot for the three genes that were outliers for  $\beta_{std,max}$

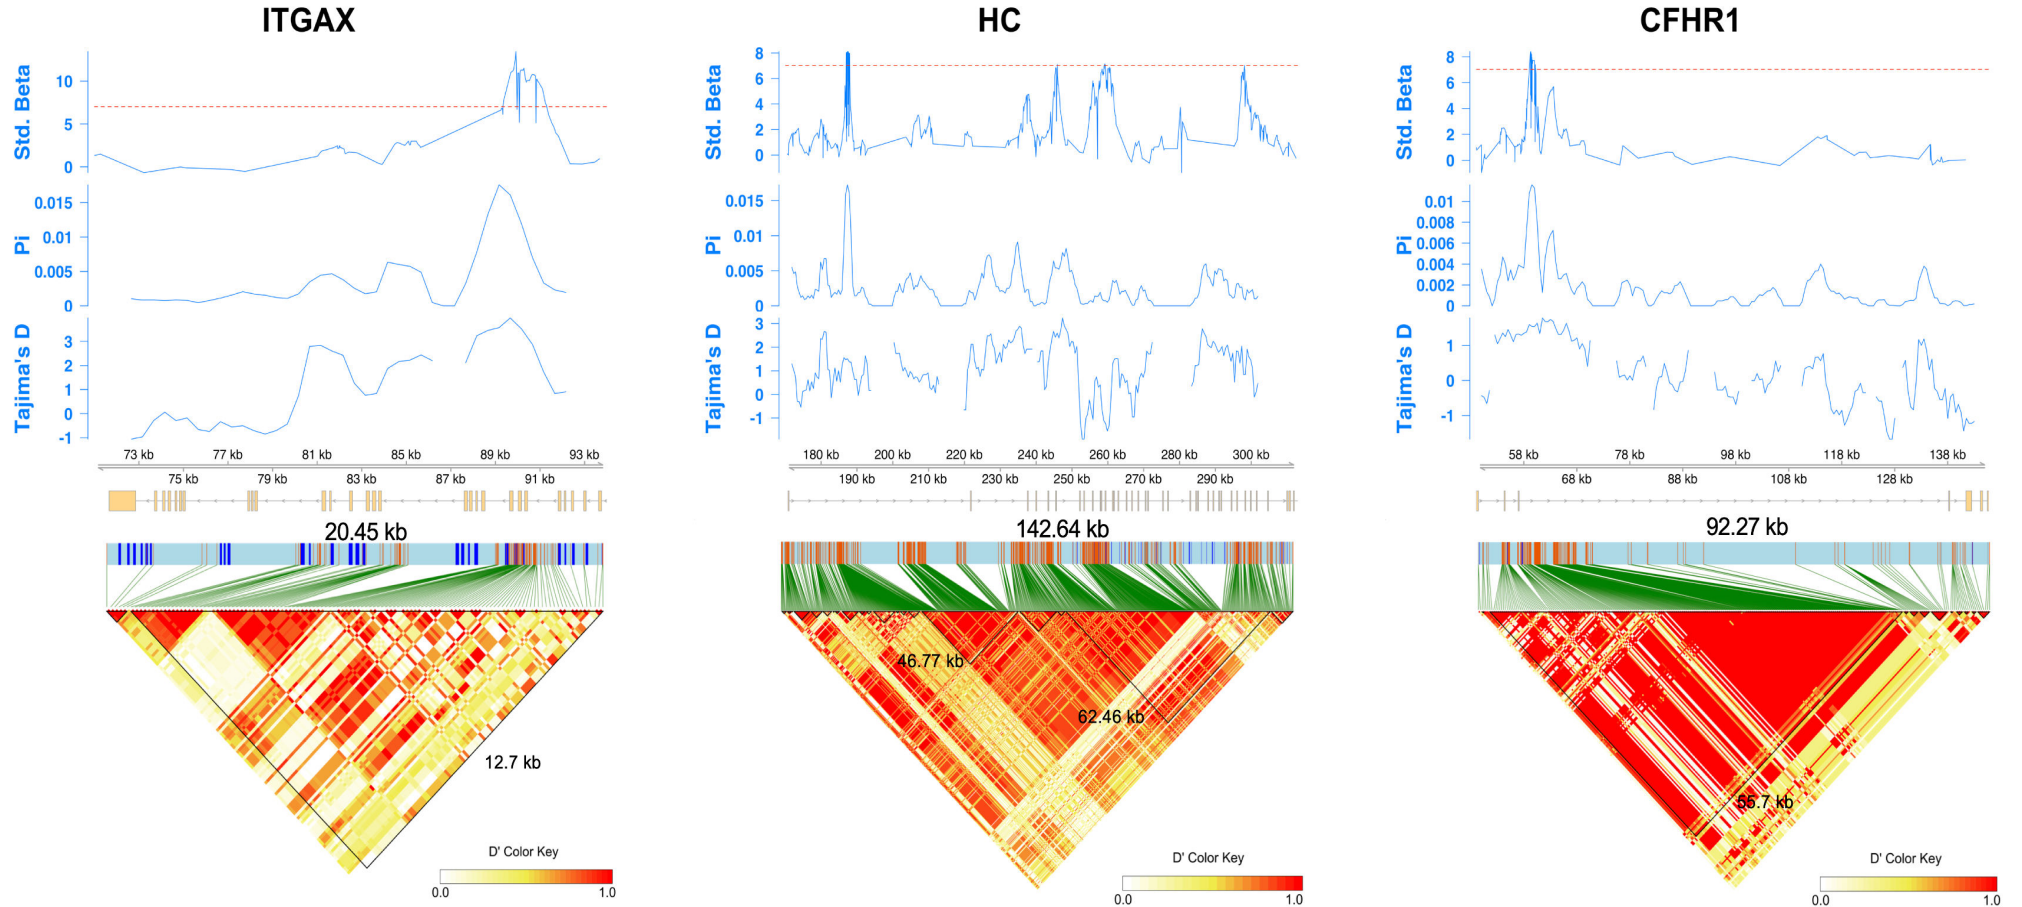

Supplement: 12862_2023_2122_MOESM2_ESM.pdf [file 12862_2023_2122_MOESM2_ESM.pdf]
